# Supplementary material
Source: publisher site journal article supplement (https://www.dovepress.com/article/391069)
Supplement: Supplementary file 1 [file get_supplementary_file.php]

**Table S1.** distribution of the *aspergillus spp* in different clinical wards

| Ward | *A. fumigatus* | *A. flavus* | *A. niger* | *A. terreus* | *A. tubingensis* | *A. lacticoffeatus* | *A. nidulans* | Total |
| --- | --- | --- | --- | --- | --- | --- | --- | --- |
| Rheumatology and immunology | 2 (1.8) |  | 1 (0.01) |  | 1 (0.87) |  |  | 4 (3.5) |
| Infection disease |  | 3 (2.7) | 1 (0.87) |  |  |  | 1 (0.87) | 5 (4.3) |
| Respiratory | 22 (19.3) | 5 (4.3) | 2 (1.8) |  | 2 (1.8) |  |  | 31 (27.2) |
| Dermatology | 4 (3.5) | 1 (0.87) | 1 (0.87) | 1 (0.87) |  |  |  | 7 (11.3) |
| Organ transplant | 1 (0.87) |  |  |  |  |  |  | 1 (0.87) |
| Burns | 5 (4.3) | 4 (3.5) |  |  |  |  |  | 9 (8.0) |
| Neurology | 1 (0.87) | 1 (0.87) |  |  |  |  |  | 2 (1.8) |
| Nephrology | 3 (2.7) | 2 (1.8) |  |  |  |  |  | 5 (4.4) |
| Oncology | 4 (3.5) |  |  | 1 (0.87) |  |  |  | 5 (4.4) |
| Cardiology | 6 (5.2) |  |  |  |  | 1 (0.87) |  | 7 (6.1) |
| Hematology | 2 (1.7) | 2 (1.7) |  |  |  |  |  | 4 (3.5) |
| Ophthalmology | 1 (0.87) | 1 (0.87) |  |  |  |  |  | 2 (1.8) |
| Intensive care unit | 18 (14.0) | 11 (9.6) | 1 (0.87) | 2 (1.8) |  |  |  | 32 (28.1) |
| Total | 69 (60.5) | 30 (26  .3) | 6 (5.2) | 4 (3.5) | 3 (2.6) | 1 (0.87) | 1 (0.87) | 114 |
